# Supplementary material
Source: PubMed Central journal article supplement (PMC6921687)
Supplement: es9b02732_si_001.pdf [file es9b02732_si_001.pdf]

Supplementary material: **“Smarter sediment screening: Effect-based quality assessment, chemical profiling and risk identification”**

**Milo L de Baat**

M.L.deBaat@uva.nl

Department of Freshwater and Marine Ecology, Institute for Biodiversity and Ecosystem Dynamics, University of Amsterdam  
Amsterdam, The Netherlands

**Nienke Wieringa**

Department of Freshwater and Marine Ecology, Institute for Biodiversity and Ecosystem Dynamics, University of Amsterdam  
Amsterdam, The Netherlands

**Steven TJ Droge**

Department of Freshwater and Marine Ecology, Institute for Biodiversity and Ecosystem Dynamics, University of Amsterdam  
Amsterdam, The Netherlands

**Bart G van Hall**

Department of Freshwater and Marine Ecology, Institute for Biodiversity and Ecosystem Dynamics, University of Amsterdam  
Amsterdam, The Netherlands

**Froukje van der Meer**

Wetterskip Fryslân, Leeuwarden, The Netherlands

**Michiel HS Kraak**

Department of Freshwater and Marine Ecology, Institute for Biodiversity and Ecosystem Dynamics, University of Amsterdam  
Amsterdam, The Netherlands

*34 Pages*

*2 Figures*

*15 Tables*

**SI 1 – Previously reported surface water and sediment contaminant concentrations at the investigated urban and agricultural locations.**

**Table S1.** Exceedances of the intervention values (>I) for PAH and metal concentrations that were previously reported in the sediment of the investigated urban locations. Locations: WK = Wittenkade, WBV= Wittenburgervaart, WD= Westerdok, BG= Bickersgracht, OBV= Oosterburgervaart.

| class         | compound | intervention  | location |     |    |    |     |
|---------------|----------|---------------|----------|-----|----|----|-----|
|               |          | value (mg/kg) | WK       | WBV | WD | BG | OBV |
| <i>PAHs</i>   |          | 40            | >I       | >I  | >I | >I | >I  |
| <i>metals</i> | As       | 85            | -        | -   | >I | -  | -   |
|               | Cd       | 14            | -        | -   | -  | >I | >I  |
|               | Cr       | 380           | -        | -   | -  | >I | >I  |
|               | Cu       | 190           | -        | -   | >I | >I | >I  |
|               | Ni       | 210           | -        | -   | -  | -  | -   |
|               | Pb       | 580           | >I       | >I  | >I | >I | >I  |
|               | Zn       | 2000          | -        | -   | >I | >I | -   |

**Table S2.** Pesticide concentrations (in µg/L) that were previously reported in the surface waters of the investigated agricultural locations. Locations: BW = Balgweg, WL = Westland, SX = Sexbierum.

| class             | Compound                            | location |      |        |
|-------------------|-------------------------------------|----------|------|--------|
|                   |                                     | BW       | WL   | SX     |
| <i>herbicides</i> | 2,4,5-trichlorophenoxy acetic acid  | 0.01     | -    | <0.06  |
|                   | 2,4- dichlorophenoxy acetic acid    | 0.01     | -    | <0.04  |
|                   | 4-(2,4-dichlorophenoxy)butyric acid | 0.02     | -    | <0.05  |
|                   | Dichlorprop                         | 0.01     | -    | <0.04  |
|                   | 2,6-dichlorobenzamide               | 0.03     | 0.02 | -      |
|                   | MCPA                                | 0.01     | -    | <0.05  |
|                   | MCPB                                | 0.01     | -    | <0.1   |
|                   | dinitro-ortho-cresol                | 0.01     | 0.07 | -      |
|                   | Aclonifen                           | -        | 0.1  | <0.03  |
|                   | Alachlor                            | 0.02     | -    | <0.02  |
|                   | Atrazine                            | 0.02     | 0.01 | <0.02  |
|                   | Bentazone                           | 0.02     | -    | 0.14   |
|                   | Bifenox                             | 0.05     | 0.02 | <0.03  |
|                   | Chlorbromuron                       | -        | 0.02 | <0.05  |
|                   | Chloroxuron                         | 0.01     | 0.02 | -      |
|                   | Chlorpropham                        | 0.03     | 0.01 | <0.02  |
|                   | Chlorotoluron                       | 0.01     | -    | <0.03  |
|                   | Chloridazon                         | 0.01     | 0.06 | 0.038  |
|                   | clomazone                           | 0.01     | 0.01 | <0.006 |

|                                |      |      |        |
|--------------------------------|------|------|--------|
| cycloxydim                     | -    | 0.03 | <0.003 |
| desethyl-atrazine              | 0.02 | 0.02 | -      |
| desethylterbuthylazine         | 0.01 | 0.05 | <0.05  |
| desmedipham                    | -    | 0.06 | <0.02  |
| desmetryn                      | 0.03 | -    | 0.01   |
| dichlobenil                    | 0.02 | 0.01 | -      |
| diflufenican                   | -    | 0.08 | <0.02  |
| dimethenamide                  | -    | 0.01 | <0.007 |
| diuron                         | 0.01 | 0.01 | <0.04  |
| ethofumesate                   | 0.01 | 0.01 | <0.1   |
| phenmedipham                   | -    | 0.06 | <0.04  |
| flufenacet                     | 0.01 | 0.07 | -      |
| fluroxypyr                     | 0.01 | -    | <0.05  |
| irgarol                        | 0.05 | -    | <0.05  |
| isoproturon                    | 0.01 | 0.01 | <0.03  |
| linuron                        | 0.01 | 0.02 | 0.034  |
| mesotrione                     | -    | 0.03 | <0.005 |
| methabenzthiazuron             | -    | 0.01 | <0.03  |
| metamitron                     | 0.02 | 0.05 | <0.03  |
| metazachlor                    | 0.02 | 0.01 | <0.003 |
| metsulfuron methyl             | -    | 0.01 | <0.002 |
| metobromuron                   | -    | 0.03 | <0.03  |
| metolachlor                    | 0.01 | 0.02 | <0.02  |
| metoxuron                      | 0.02 | 0.01 | <0.03  |
| metribuzin                     | 0.02 | 0.01 | <0.009 |
| monolinuron                    | -    | 0.01 | 0.026  |
| monuron                        | -    | 0.03 | <0.03  |
| nicosulfuron                   | -    | 0.01 | <0.004 |
| pendimethalin                  | -    | 0.01 | <0.03  |
| propazine                      | 0.02 | 0.01 | -      |
| propyzamide                    | 0.02 | 0.01 | -      |
| prosulfocarb                   | 0.01 | -    | <0.01  |
| simazine                       | 0.02 | 0.02 | <0.01  |
| sulcotrion                     | -    | 0.06 | <0.007 |
| terbutrin                      | 0.01 | 0.01 | <0.04  |
| terbuthylazine                 | 0.02 | 0.01 | <0.02  |
| tri-allate                     | -    | 0.01 | <0.02  |
| trifluralin                    | 0.02 | 0.02 | <0.02  |
| triflusulfuron methyl          | -    | 0.01 | <0.008 |
| <i>insecticides</i> avermectin | 0.07 | 0.07 | -      |
| acetamiprid                    | -    | 0.01 | <0.003 |
| aldicarb                       | 0.01 | 0.05 | -      |
| aldoxycarb                     | 0.05 | 0.05 | -      |
| chlorfenvinphos                | 0.02 | 0.02 | <0.02  |
| coumaphos                      | 0.08 | -    | <0.004 |
| cypermethrin                   | 0.05 | -    | <0.04  |

|                                |      |       |          |
|--------------------------------|------|-------|----------|
| deltamethrin                   | 0.03 | 0.02  | <0.02    |
| diazinon                       | 0.04 | 0.01  | <0.02    |
| dichlorvos                     | 0.05 | 0.02  | <0.01    |
| dimethoate                     | 0.04 | 0.03  | <0.02    |
| disulfoton                     | -    | 0.02  | <0.02    |
| esfenvalerate                  | 0.02 | 0.01  | <0.03    |
| ethoprophos                    | 0.02 | -     | <0.02    |
| azinphos-ethyl                 | 0.01 | -     | <0.04    |
| bromophos-ethyl                | 0.02 | 0.01  | -        |
| chlorpyrifos                   | -    | 0.01  | <0.02    |
| parathion                      | 0.03 | 0.06  | <0.02    |
| fenamiphos                     | 0.01 | 0.02  | -        |
| fenitrothion                   | 0.03 | 0.1   | <0.03    |
| fenoxycarb                     | 0.02 | 0.02  | -        |
| fenthion                       | 0.02 | 0.01  | <0.02    |
| fipronil                       | 0.01 | 0.02  | <0.03    |
| flonicamid                     | -    | 0.09  | <0.09    |
| phosalone                      | 0.05 | 0.01  | -        |
| phosphamidon                   | 0.05 | 0.02  | -        |
| heptenophos                    | 0.02 | 0.01  | <0.01    |
| hexythiazox                    | 0.01 | 0.01  | -        |
| imidacloprid                   | 0.02 | 0.006 | <0.006   |
| lambda-cyhalothrin             | -    | 0.01  | <0.03    |
| malathion                      | 0.02 | 0.01  | <0.02    |
| methiocarb                     | 0.02 | 0.01  | <0.01    |
| methoxyfenozide                | 0.01 | 0.04  | -        |
| azinphos-methyl                | 0.03 | 0.02  | <0.06    |
| bromophos-methyl               | 0.02 | 0.01  | -        |
| pirimiphos-methyl              | -    | 0.01  | < 0.0006 |
| mevinphos                      | 0.04 | 0.01  | < 0.02   |
| pentachlorophenol              | 0.06 | -     | < 0.2    |
| pirimicarb                     | 0.01 | 0.03  | < 0.005  |
| propoxur                       | 0.03 | 0.01  | < 0.006  |
| tetrachlorvinphos              | 0.02 | 0.01  | -        |
| thiacloprid                    | 0.01 | -     | < 0.006  |
| thiamethoxam                   | -    | 0.28  | 0.013    |
| triazophos                     | 0.03 | 0.01  | < 0.02   |
| <i>fungicides</i> azoxystrobin | 0.01 | 0.2   | 0.23     |
| bitertanol                     | 0.02 | 0.01  | -        |
| boscalid                       | 0.01 | 0.03  | 0.08     |
| carbendazim                    | 0.09 | 0.23  | < 0.02   |
| chlorothalonil                 | -    | 0.03  | < 0.02   |
| cymoxanil                      | -    | 0.06  | < 0.03   |
| cyproconazole                  | -    | 0.07  | < 0.03   |
| cyprodinil                     | 0.01 | 0.1   | -        |
| dichlofluanid                  | -    | 0.02  | < 0.02   |

|                  |      |      |         |
|------------------|------|------|---------|
| difenoconazole   | -    | 0.04 | < 0.03  |
| dimethomorph     | 0.02 | 0.04 | < 0.04  |
| dodemorph        | 0.04 | 0.06 | -       |
| epoxiconazole    | 0.02 | -    | 0.018   |
| etridiazole      | 0.08 | 0.01 | -       |
| fenpropidin      | -    | 0.02 | < 0.02  |
| fenpropimorph    | -    | 0.01 | < 0.05  |
| fluazinam        | 0.02 | 0.12 | < 0.02  |
| flutolanil       | -    | 0.01 | 0.015   |
| furalaxyl        | 0.02 | 0.01 | -       |
| imazalil         | 0.01 | 0.03 | < 0.04  |
| iprodione        | -    | 0.03 | < 0.05  |
| kresoxim-methyl  | 0.01 | 0.02 | < 0.02  |
| metalaxyl        | 0.02 | 0.03 | < 0.006 |
| pencycuron       | 0.02 | 0.01 | 0.14    |
| prochloraz       | 0.05 | -    | < 0.02  |
| procymidone      | 0.01 | 0.02 | -       |
| propamocarb      | -    | 0.03 | < 0.04  |
| propiconazole    | 0.02 | -    | < 0.02  |
| pyraclostrobin   | 0.01 | 0.05 | < 0.005 |
| pyrazophos       | 0.03 | 0.01 | -       |
| pyrimethanil     | 0.01 | 0.02 | -       |
| tebuconazole     | 0.03 | 0.02 | < 0.06  |
| thiabendazole    | 0.02 | -    | < 0.06  |
| tolclofos-methyl | 0.01 | 0.01 | < 0.08  |
| tolyfluanid      | -    | 0.01 | < 0.02  |
| triadimenol      | -    | 0.02 | < 0.03  |
| trifloxystrobin  | 0.02 | 0.02 | < 0.005 |
| vinclozolin      | -    | 0.01 | 0.02    |

## SI 2 - Sampling locations.

**Table S3.** Overview of the investigated study sites, with grouping based on their main pollution source.

| land use           | location          | name code | GPS coordinates     | sampling day (dd/mm/yy) |
|--------------------|-------------------|-----------|---------------------|-------------------------|
| <i>Reference</i>   | Science Park      | SP        | 52.356795, 4.955046 | 03/04/17                |
| <i>Urban</i>       | Wittenkade        | WK        | 52.380458, 4.873499 | 23/03/17                |
|                    | Wittenburgervaart | WBV       | 52.371604, 4.924437 | 21/03/17                |
|                    | Westerdok         | WD        | 52.387007, 4.891236 | 22/03/17                |
|                    | Bickersgracht     | BG        | 52.386725, 4.888277 | 20/03/17                |
|                    | Oostenburgervaart | OBV       | 52.369790, 4.926579 | 17/03/17                |
| <i>WWTP</i>        | Hilversum         | HI        | 52.252807, 5.243704 | 24/03/17                |
|                    | Eindhoven         | EI        | 51.463189, 5.508095 | 30/03/17                |
|                    | Utrecht           | UT        | 52.109390, 5.104465 | 31/03/17                |
| <i>Agriculture</i> | Balgweg           | BW        | 52.886506, 4.870424 | 27/03/17                |
|                    | Westland          | WL        | 51.961299, 4.192689 | 28/03/17                |
|                    | Sexbierum         | SX        | 53.227556, 5.497638 | 29/03/17                |

**Figure S1.** Sediment sampling locations in The Netherlands.

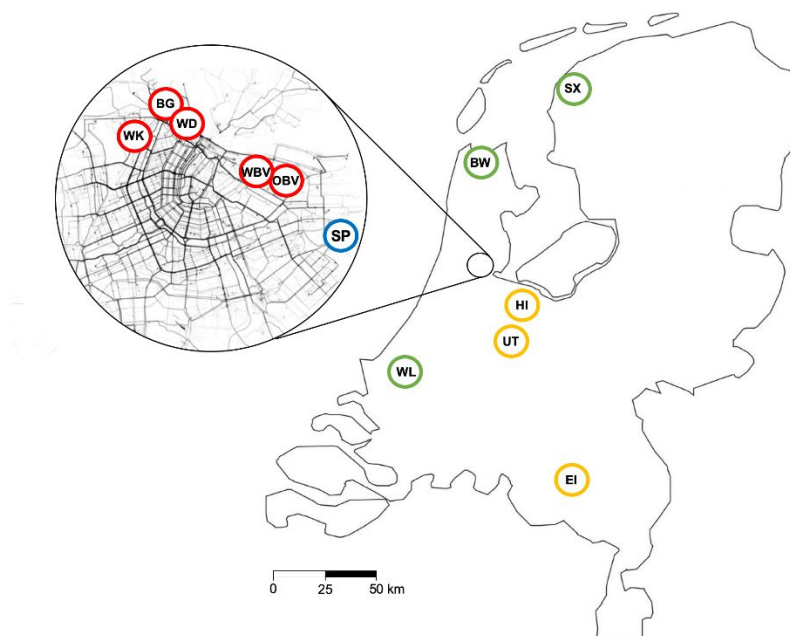

### SI 3 - Chemical target analysis of sediment associated contaminants.

#### Additional details on total extraction of metals from sediment samples

For each location in duplicate, approximately 250 mg sample was used to extract metals. Sediment with 4 mL HNO<sub>3</sub> 65% and 2 mL of HCl 37% was added to a destruction tube. After 60 minutes, 1 mL of ultra-pure water was added and the tubes were placed in a microwave (Multiwave; Perkin Elmer, Groningen, The Netherlands) for destruction. After the extraction, the sample (approx. 5 mL) was transferred to a 50 mL volumetric flask and supplemented with ultra-pure water to 50 mL. Per sample, 1 mL was diluted with 8 mL ultra-pure water and 0.5 ml cesium chloride and 0.5 ml yttrium internal standards to a final volume of 10 mL.

**Table S4.** Compounds targeted in chemical profiling of the investigated sediments and their respective limits of quantification (LOQ). In fiber and freely dissolved LOQs are calculated based on logK<sub>ow</sub>, logK<sub>fw</sub> and analytical LOQ using the equations presented in the main body of the article.

| compound group |                 |                |        |          |     |      |
|----------------|-----------------|----------------|--------|----------|-----|------|
| inorganic      | target compound | pollutant type | remark | detector | LOQ | unit |
| <i>metals</i>  | Al              | legacy         |        | ICP-OES  | 24  | µg/L |
|                | As              | legacy         |        | ICP-OES  | 37  | µg/L |
|                | Ag              | legacy         |        | ICP-OES  | 1   | µg/L |
|                | Cd              | legacy         |        | ICP-OES  | 1   | µg/L |
|                | Cr              | legacy         |        | ICP-OES  | 2   | µg/L |
|                | Cu              | legacy         |        | ICP-OES  | 1   | µg/L |
|                | Fe              | legacy         |        | ICP-OES  | 1   | µg/L |
|                | Mn              | legacy         |        | ICP-OES  | 3   | µg/L |
|                | Ni              | legacy         |        | ICP-OES  | 4   | µg/L |
|                | Pb              | legacy         |        | ICP-OES  | 15  | µg/L |

|    |        |         |    |      |
|----|--------|---------|----|------|
| Se | legacy | ICP-OES | 16 | µg/L |
| Zn | legacy | ICP-OES | 4  | µg/L |

| compound group      | organic | target compound                     | pollutant type       | remark         | detector | logK <sub>ow</sub> | logK <sub>fw</sub> | LOQ        |          |                  | unit |
|---------------------|---------|-------------------------------------|----------------------|----------------|----------|--------------------|--------------------|------------|----------|------------------|------|
|                     |         |                                     |                      |                |          |                    |                    | analytical | in fiber | freely dissolved |      |
| <i>PAHs</i>         |         | phenanthrene                        | legacy               |                | LC-FLU   | 4.46               | 4.29               | 12         | 3908.1   | 0.200            | µg/L |
|                     |         | Pyrene                              | legacy               |                | LC-FLU   | 4.88               | 4.99               | 2          | 651.4    | 0.007            | µg/L |
| <i>WWTP markers</i> |         | HHCB                                | musk fragrance       |                | GC-MS    | 5.9                | 6.19               | 100        | 24450.6  | 0.016            | µg/L |
|                     |         | bisphenol A                         | plastic precursor    |                | LC-MS    | 3.3                | 3.30               | 2          | 651.4    | 0.326            | µg/L |
|                     |         | Nonylphenol                         | surfactant precursor | isomer mixture | GC-MS    | 5.15               | 5.36               | 100        | 24450.6  | 0.108            | µg/L |
|                     |         | Triclosan                           | antimicrobial agent  |                | GC-MS    | 4.3                | 4.41               | 100        | 24450.6  | 0.949            | µg/L |
|                     |         | mehtyl-triclosan                    | metabolite           |                | GC-MS    | 5                  | 5.19               | 100        | 24450.6  | 0.158            | µg/L |
| <i>pesticides</i>   |         | 2,4,5-trichlorophenoxyacetic acid   | herbicides           | dissociated    | LC-MS    | 4                  | 4.08               | 6          | 1954.1   | 0.163            | µg/L |
|                     |         | 2,4-dichlorophenoxyacetic acid      | herbicides           | dissociated    | LC-MS    | 2.81               | 2.76               | 4          | 1302.7   | 2.287            | µg/L |
|                     |         | dichlorprop                         | herbicides           | dissociated    | LC-MS    | 3.43               | 3.44               | 4          | 1302.7   | 0.468            | µg/L |
|                     |         | 2,6-di-tert-butyl-4-methylphenol    | n.a.                 |                | GC-MS    | 5.1                | 5.30               | 250        | 81418.8  | 0.408            | µg/L |
|                     |         | 4-(2,4-dichlorophenoxy)butyric acid | herbicides           | dissociated    | LC-MS    | 3.53               | 3.56               | 5          | 1628.4   | 0.453            | µg/L |
|                     |         | 4-chloroaniline                     | n.a.                 |                | GC-MS    | 1.83               | 1.67               | 50         | 16283.8  | 350.823          | µg/L |
|                     |         | 4-chlorophenoxyacetic acid          | herbicides           | dissociated    | LC-MS    | 2.25               | 2.13               | 4          | 1302.7   | 9.583            | µg/L |
|                     |         | 4-nonylphenol                       | n.a.                 |                | GC-MS    | 5.76               | 6.03               | 10         | 3256.8   | 0.003            | µg/L |
|                     |         | 4-tert-octylphenol                  | n.a.                 |                | GC-MS    | 5.25               | 5.47               | 25         | 8141.9   | 0.028            | µg/L |
|                     |         | acetamiprid                         | insecticides         |                | LC-MS    | 0.8                | 0.52               | 0.3        | 97.7     | 29.355           | µg/L |
|                     |         | aclonifen                           | herbicides           |                | GC-MS    | 4.04               | 4.12               | 500        | 162837.7 | 12.289           | ng/L |
|                     |         | alachlor                            | herbicides           |                | GC-MS    | 3.52               | 3.54               | 150        | 48851.3  | 13.945           | ng/L |
|                     |         | atrazine                            | herbicides           |                | GC-MS    | 2.61               | 2.53               | 100        | 32567.5  | 95.379           | ng/L |
|                     |         | azinphos-ethyl                      | insecticides         |                | GC-MS    | 3.18               | 3.17               | 250        | 81418.8  | 55.470           | ng/L |
|                     |         | azinphos-methyl                     | insecticides         |                | GC-MS    | 2.75               | 2.69               | 750        | 244256.5 | 499.985          | ng/L |
|                     |         | azoxystrobin                        | fungicides           |                | LC-MS    | 2.5                | 2.41               | 0.9        | 293.1    | 1.137            | µg/L |
|                     |         | bentazon                            | herbicides           |                | LC-MS    | 2.8                | 2.74               | 3          | 977.0    | 1.760            | µg/L |
|                     |         | bifenox                             | herbicides           |                | GC-MS    | 4.48               | 4.61               | 1.25       | 407.1    | 0.010            | µg/L |
|                     |         | bixafen                             | fungicides           |                | LC-MS    | 3.3                | 3.30               | 0.8        | 260.5    | 0.131            | µg/L |
|                     |         | boscalid                            | fungicides           |                | LC-MS    | 2.96               | 2.92               | 2          | 651.4    | 0.779            | µg/L |



|                                   |                  |       |       |       |      |          |           |      |
|-----------------------------------|------------------|-------|-------|-------|------|----------|-----------|------|
| carbendazim                       | fungicides       | LC-MS | 1.48  | 1.28  | 2    | 651.4    | 34.359    | µg/L |
| carfentrazone-ethyl               | herbicides       | GC-MS | n.a.  | n.a.  | 150  | 48851.3  | n.a.      | ng/L |
| chlorbromuron                     | herbicides       | LC-MS | 3.09  | 3.07  | 5    | 1628.4   | 1.397     | µg/L |
| chlorfenvinphos                   | insecticides     | GC-MS | 3.81  | 3.87  | 500  | 162837.7 | 22.135    | ng/L |
| chloridazon                       | herbicides       | LC-MS | 1.14  | 0.90  | 0.5  | 162.8    | 20.500    | µg/L |
| chlorothalonil                    | fungicides       | GC-MS | 2.94  | 2.90  | 125  | 40709.4  | 51.250    | µg/L |
| chlorotoluron                     | herbicides       | LC-MS | 2.41  | 2.31  | 3    | 977.0    | 4.773     | µg/L |
| chlorpropham                      | herbicides       | LC-MS | 2.96  | 2.92  | 2    | 651.4    | 0.779     | µg/L |
| chlorpyrifos                      | insecticides     | GC-MS | 4.96  | 5.14  | 750  | 244256.5 | 1.751     | ng/L |
| cis-1,2,3,6-tetrahydrophthalimide | n.a.             | GC-MS | 0.3   | -0.03 | 12.5 | 4070.9   | 4395.702  | µg/L |
| clomazone                         | herbicides       | LC-MS | 2.5   | 2.41  | 0.6  | 195.4    | 0.758     | µg/L |
| clothianidin                      | insecticides     | LC-MS | 0.905 | 0.64  | 10   | 3256.8   | 747.990   | µg/L |
| coumaphos                         | insecticides     | LC-MS | 4.13  | 4.22  | 0.4  | 130.3    | 0.008     | µg/L |
| cyazofamid                        | fungicides       | LC-MS | 3.2   | 3.19  | 4    | 1302.7   | 0.843     | µg/L |
| cycloxydim                        | herbicides       | LC-MS | 3.31  | 3.31  | 0.3  | 97.7     | 0.048     | µg/L |
| cymoxanil                         | fungicides       | LC-MS | 0.67  | 0.38  | 3    | 977.0    | 409.382   | µg/L |
| cypermethrin                      | insecticides     | GC-MS | 6.6   | 6.97  | 225  | 73276.9  | 0.008     | ng/L |
| cyproconazole                     | fungicides       | LC-MS | 3.09  | 3.07  | 3    | 977.0    | 0.838     | µg/L |
| DEHP                              | n.a.             | GC-MS | 7.6   | 8.08  | 250  | 81418.8  | 0.001     | µg/L |
| deltamethrin                      | insecticides     | GC-MS | 6.2   | 6.52  | 250  | 81418.8  | 0.024     | ng/L |
| desethylterbutylazine             | herbicides       | GC-MS | 2.23  | 2.11  | 500  | 162837.7 | 1260.793  | ng/L |
| desmedipham                       | herbicides       | LC-MS | 3.39  | 3.40  | 2    | 651.4    | 0.259     | µg/L |
| diazinon                          | insecticides     | GC-MS | 3.81  | 3.87  | 50   | 16283.8  | 2.214     | ng/L |
| dichlofluanid                     | fungicides       | GC-MS | 3.7   | 3.74  | 200  | 65135.1  | 11.732    | ng/L |
| dichlorvos                        | insecticides     | GC-MS | 1.43  | 1.22  | 50   | 16283.8  | 976.186   | ng/L |
| dicofol                           | insecticides     | GC-MS | 4.3   | 4.41  | 50   | 16283.8  | 0.632     | ng/L |
| DEET                              | insect repellent | GC-MS | 2.18  | 2.06  | 500  | 162837.7 | 1432.845  | ng/L |
| difenoconazole                    | fungicides       | GC-MS | 4.36  | 4.48  | 1.25 | 407.1    | 0.014     | µg/L |
| diflufenican                      | herbicides       | GC-MS | 4.9   | 5.08  | 500  | 162837.7 | 1.361     | ng/L |
| dimethanamid                      | herbicides       | LC-MS | 1.89  | 1.73  | 0.7  | 228.0    | 4.213     | µg/L |
| dimethoate                        | insecticides     | GC-MS | 0.78  | 0.50  | 125  | 40709.4  | 12873.448 | ng/L |

|                            |              |             |       |       |       |      |          |           |      |
|----------------------------|--------------|-------------|-------|-------|-------|------|----------|-----------|------|
| dimethomorph               | fungicides   |             | GC-MS | 2.68  | 2.61  | 150  | 48851.3  | 119.609   | ng/L |
| disulfoton                 | insecticides |             | GC-MS | 4.02  | 4.10  | 1    | 325.7    | 0.026     | µg/L |
| diuron                     | herbicides   |             | LC-MS | 2.68  | 2.61  | 4    | 1302.7   | 3.190     | µg/L |
| epoxiconazole              | fungicides   |             | LC-MS | 3.3   | 3.30  | 1    | 325.7    | 0.163     | µg/L |
| esfenvalerate              | insecticides |             | GC-MS | 6.22  | 6.54  | 500  | 162837.7 | 0.046     | ng/L |
| ethofumesate               | herbicides   |             | LC-MS | 2.7   | 2.63  | 10   | 3256.8   | 7.576     | µg/L |
| ethoprophos                | insecticides |             | GC-MS | 3.59  | 3.62  | 50   | 16283.8  | 3.886     | ng/L |
| fenamiphos                 | insecticides |             | GC-MS | 3.23  | 3.22  | 750  | 244256.5 | 146.428   | ng/L |
| fenitrothion               | insecticides |             | GC-MS | 3.3   | 3.30  | 75   | 24425.6  | 12.242    | ng/L |
| fenoxycarb                 | insecticides |             | GC-MS | 4.3   | 4.41  | 1.25 | 407.1    | 0.016     | µg/L |
| fenpropidin                | fungicides   | protonated  | LC-MS | 2.6   | 2.52  | 2    | 651.4    | 1.957     | µg/L |
| fenpropimorph              | fungicides   |             | GC-MS | 4.5   | 4.63  | 100  | 32567.5  | 0.758     | ng/L |
| fenthion                   | insecticides |             | GC-MS | 4.091 | 4.18  | 75   | 24425.6  | 1.618     | ng/L |
| fipronil                   | insecticides |             | LC-MS | 4     | 4.08  | 3    | 977.0    | 0.082     | µg/L |
| flonicamid                 | insecticides |             | LC-MS | -0.24 | -0.63 | 9    | 2931.1   | 12599.714 | µg/L |
| florasulam                 | herbicides   |             | LC-MS | -1.22 | -1.72 | 0.3  | 97.7     | 5153.809  | µg/L |
| fluazifop-p-butyl          | herbicides   |             | GC-MS | 4.5   | 4.63  | 125  | 40709.4  | 0.947     | ng/L |
| fluazinam                  | fungicides   |             | LC-MS | 4.03  | 4.11  | 2    | 651.4    | 0.050     | µg/L |
| fluopicolide               | fungicides   |             | LC-MS | 2.9   | 2.86  | 0.4  | 130.3    | 0.182     | µg/L |
| fluoxastrobin              | fungicides   |             | LC-MS | 2.86  | 2.81  | 0.4  | 130.3    | 0.201     | µg/L |
| fluroxypyr                 | herbicides   | dissociated | LC-MS | 2.2   | 2.08  | 5    | 1628.4   | 13.614    | µg/L |
| flutolanil                 | fungicides   |             | LC-MS | 3.17  | 3.16  | 0.4  | 130.3    | 0.091     | µg/L |
| heptenophos                | insecticides |             | GC-MS | 2.32  | 2.21  | 50   | 16283.8  | 100.148   | ng/L |
| imazalil                   | fungicides   |             | LC-MS | 2.56  | 2.48  | 4    | 1302.7   | 4.336     | µg/L |
| imidacloprid               | insecticides |             | LC-MS | 0.57  | 0.27  | 0.6  | 195.4    | 105.747   | µg/L |
| iodosulfuron-methyl-sodium | herbicides   | dissociated | LC-MS | -0.7  | -1.14 | 0.5  | 162.8    | 2270.907  | µg/L |
| ioxynil                    | herbicides   | dissociated | LC-MS | 0.9   | 0.63  | 3    | 977.0    | 227.286   | µg/L |
| iprodione                  | fungicides   |             | GC-MS | 3     | 2.97  | 500  | 162837.7 | 175.828   | ng/L |
| irgarol                    | herbicides   |             | GC-MS | 4.07  | 4.16  | 500  | 162837.7 | 11.381    | ng/L |
| isoproturon                | herbicides   |             | LC-MS | 2.84  | 2.79  | 3    | 977.0    | 1.589     | µg/L |
| kresoxim-methyl            | fungicides   |             | GC-MS | 3.4   | 3.41  | 75   | 24425.6  | 9.478     | ng/L |

|                     |              |             |       |       |       |      |          |           |      |
|---------------------|--------------|-------------|-------|-------|-------|------|----------|-----------|------|
| lambda-cyhalothrin  | insecticides |             | GC-MS | 6.8   | 7.19  | 200  | 65135.1  | 0.004     | ng/L |
| linuron             | herbicides   |             | LC-MS | 3.2   | 3.19  | 2    | 651.4    | 0.422     | µg/L |
| malathion           | insecticides |             | GC-MS | 2.36  | 2.26  | 17.5 | 5699.3   | 31.642    | ng/L |
| mandipropamid       | fungicides   |             | LC-MS | 3.2   | 3.19  | 0.6  | 195.4    | 0.126     | µg/L |
| MCPA                | herbicides   | dissociated | LC-MS | 3.25  | 3.24  | 5    | 1628.4   | 0.927     | µg/L |
| MCPB                | herbicides   | dissociated | LC-MS | 2.79  | 2.73  | 10   | 3256.8   | 6.018     | µg/L |
| MCPP-p              | herbicides   | dissociated | LC-MS | 3.2   | 3.19  | 3    | 977.0    | 0.632     | µg/L |
| mesosulfuron-methyl | herbicides   | dissociated | LC-MS | -0.48 | -0.90 | 0.3  | 97.7     | 776.079   | µg/L |
| mesotrione          | herbicides   |             | LC-MS | 0.9   | 0.63  | 0.5  | 162.8    | 37.881    | µg/L |
| metalaxyl-m         | fungicides   |             | LC-MS | 1.75  | 1.58  | 0.6  | 195.4    | 5.166     | µg/L |
| metamitron          | herbicides   |             | LC-MS | 0.83  | 0.56  | 3    | 977.0    | 271.863   | µg/L |
| metazachlor         | herbicides   |             | LC-MS | 2.13  | 2.00  | 0.3  | 97.7     | 0.977     | µg/L |
| metconazole         | fungicides   |             | GC-MS | 3.85  | 3.91  | 750  | 244256.5 | 29.973    | ng/L |
| methabenzthiazuron  | herbicides   |             | LC-MS | 2.64  | 2.57  | 3    | 977.0    | 2.650     | µg/L |
| methiocarb          | insecticides |             | LC-MS | 2.92  | 2.88  | 1    | 325.7    | 0.432     | µg/L |
| metobromuron        | herbicides   |             | LC-MS | 2.38  | 2.28  | 3    | 977.0    | 5.154     | µg/L |
| metolachlor         | herbicides   |             | LC-MS | 3.13  | 3.11  | 2    | 651.4    | 0.504     | µg/L |
| metoxuron           | herbicides   |             | LC-MS | 1.64  | 1.46  | 3    | 977.0    | 34.226    | µg/L |
| metrafenone         | fungicides   |             | GC-MS | 4.3   | 4.41  | 1.25 | 407.1    | 0.016     | µg/L |
| metribuzin          | herbicides   |             | LC-MS | 1.7   | 1.52  | 0.9  | 293.1    | 8.807     | µg/L |
| metsulfuron-methyl  | herbicides   |             | LC-MS | 2.2   | 2.08  | 0.2  | 65.1     | 0.545     | µg/L |
| mevinphos           | insecticides |             | GC-MS | 0.13  | -0.22 | 50   | 16283.8  | 27162.959 | ng/L |
| monolinuron         | herbicides   |             | LC-MS | 2.3   | 2.19  | 2    | 651.4    | 4.216     | µg/L |
| monuron             | herbicides   |             | LC-MS | 1.94  | 1.79  | 3    | 977.0    | 15.886    | µg/L |
| nicosulfuron        | herbicides   | dissociated | LC-MS | 0.35  | 0.02  | 0.4  | 130.3    | 123.772   | µg/L |
| oxadiazon           | herbicides   |             | LC-MS | 5.33  | 5.56  | 10   | 3256.8   | 0.009     | µg/L |
| oxydemeton-methyl   | insecticides |             | LC-MS | -0.74 | -1.19 | 1    | 325.7    | 5031.225  | µg/L |
| parathion-ethyl     | insecticides |             | GC-MS | 3.83  | 3.89  | 75   | 24425.6  | 3.155     | ng/L |
| parathion-methyl    | insecticides |             | GC-MS | 3     | 2.97  | 75   | 24425.6  | 26.374    | ng/L |
| penycuron           | fungicides   |             | LC-MS | 4.68  | 4.83  | 0.7  | 228.0    | 0.003     | µg/L |
| pendimethalin       | herbicides   |             | GC-MS | 5.2   | 5.41  | 150  | 48851.3  | 0.190     | ng/L |

|                    |              |             |       |       |       |     |          |           |      |
|--------------------|--------------|-------------|-------|-------|-------|-----|----------|-----------|------|
| pentachlorophenol  | insecticides | dissociated | LC-MS | 5.12  | 5.32  | 20  | 6513.5   | 0.031     | µg/L |
| phenmedipham       | herbicides   |             | LC-MS | 3.59  | 3.62  | 4   | 1302.7   | 0.311     | µg/L |
| phtalimide         | fungicides   |             | GC-MS | 3.01  | 2.98  | 25  | 8141.9   | 8.569     | µg/L |
| pirimicarb         | insecticides |             | LC-MS | 1.7   | 1.52  | 50  | 16283.8  | 489.252   | ng/L |
| pirimiphos-methyl  | insecticides |             | LC-MS | 4.12  | 4.21  | 100 | 32567.5  | 2.003     | ng/L |
| prochloraz         | fungicides   |             | LC-MS | 3.5   | 3.52  | 2   | 651.4    | 0.196     | µg/L |
| propamocarb        | fungicides   | protonated  | LC-MS | -1.3  | -1.81 | 4   | 1302.7   | 84324.924 | µg/L |
| propiconazool      | fungicides   |             | GC-MS | 3.72  | 3.77  | 150 | 48851.3  | 8.360     | ng/L |
| propoxur           | insecticides |             | LC-MS | 1.52  | 1.32  | 0.6 | 195.4    | 9.305     | µg/L |
| prosulfocarb       | herbicides   |             | GC-MS | 4.65  | 4.80  | 50  | 16283.8  | 0.258     | ng/L |
| prothioconazole    | fungicides   |             | LC-MS | 2     | 1.86  | 30  | 9770.3   | 136.254   | µg/L |
| pyraclostrobin     | fungicides   |             | LC-MS | 3.99  | 4.07  | 0.5 | 162.8    | 0.014     | µg/L |
| pyraflufen-ethyl   | herbicides   |             | GC-MS | 3.49  | 3.51  | 750 | 244256.5 | 75.290    | ng/L |
| pyridaben          | insecticides |             | GC-MS | 6.37  | 6.71  | 1   | 325.7    | 0.000     | µg/L |
| pyroxsulam         | herbicides   |             | LC-MS | -1.01 | -1.49 | 0.6 | 195.4    | 6023.168  | µg/L |
| quinoxifen         | fungicides   |             | GC-MS | 5.1   | 5.30  | 75  | 24425.6  | 0.122     | ng/L |
| quizalofop-p-ethyl | herbicides   |             | GC-MS | 4.61  | 4.76  | 500 | 162837.7 | 2.859     | ng/L |
| rimsulfuron        | herbicides   | dissociated | LC-MS | -1.46 | -1.99 | 0.6 | 195.4    | 19046.930 | µg/L |
| simazine           | herbicides   |             | GC-MS | 2.18  | 2.06  | 200 | 65135.1  | 573.138   | ng/L |
| sulcotrione        | herbicides   |             | LC-MS | 2.31  | 2.20  | 0.7 | 228.0    | 1.438     | µg/L |
| tebuconazole       | fungicides   |             | GC-MS | 3.7   | 3.74  | 125 | 40709.4  | 7.332     | ng/L |
| tepraloxydim       | herbicides   |             | LC-MS | 1.5   | 1.30  | 2   | 651.4    | 32.645    | µg/L |
| terbuthylazine     | herbicides   |             | GC-MS | 3.4   | 3.41  | 500 | 162837.7 | 63.189    | ng/L |
| terbutryn          | herbicides   |             | GC-MS | 3.74  | 3.79  | 75  | 24425.6  | 3.972     | ng/L |
| thiabendazole      | fungicides   |             | LC-MS | 2.39  | 2.29  | 6   | 1954.1   | 10.047    | µg/L |
| thiacloprid        | insecticides |             | LC-MS | 1.26  | 1.03  | 0.6 | 195.4    | 18.097    | µg/L |
| thiamethoxam       | insecticides |             | LC-MS | -0.13 | -0.51 | 0.3 | 97.7     | 316.969   | µg/L |
| tolclofos-methyl   | fungicides   |             | LC-MS | 3.8   | 3.86  | 8   | 2605.4   | 0.363     | µg/L |
| Tolyfluanide       | fungicides   |             | GC-MS | 3.9   | 3.97  | 500 | 162837.7 | 17.583    | ng/L |
| Triadimenol        | fungicides   |             | LC-MS | 3.18  | 3.17  | 3   | 977.0    | 0.666     | µg/L |
| tri-allate         | herbicides   |             | GC-MS | 4.6   | 4.74  | 50  | 16283.8  | 0.293     | ng/L |

|                       |              |             |       |       |       |     |         |          |      |
|-----------------------|--------------|-------------|-------|-------|-------|-----|---------|----------|------|
| Triazophos            | insecticides |             | GC-MS | 3.55  | 3.58  | 150 | 48851.3 | 12.915   | ng/L |
| Trifloxystrobin       | fungicides   |             | LC-MS | 4.5   | 4.63  | 0.5 | 162.8   | 0.004    | µg/L |
| Trifluralin           | herbicides   |             | GC-MS | 5.34  | 5.57  | 50  | 16283.8 | 0.044    | ng/L |
| triflusulfuron-methyl | herbicides   | dissociated | LC-MS | 3.94  | 4.01  | 0.8 | 260.5   | 0.025    | µg/L |
| trinexapac-ethyl      | herbicides   |             | LC-MS | -0.29 | -0.69 | 0.8 | 260.5   | 1272.810 | µg/L |
| Tritosulfuron         | herbicides   | dissociated | LC-MS | 2.93  | 2.89  | 0.6 | 195.4   | 0.252    | µg/L |

## Chromatographic details of target organic compound analysis in SPME extracts

**Table S5:** Chromatographic details of organic compound analysis.

| Contaminant analysis<br>(supplier of standard)                                                                                                                                                                                                                               | Chromatographic separation                                                                                                                                                                                                                                                                                                                          | Detection                                                                                                                                                                                                                                                                                                                                          |
|------------------------------------------------------------------------------------------------------------------------------------------------------------------------------------------------------------------------------------------------------------------------------|-----------------------------------------------------------------------------------------------------------------------------------------------------------------------------------------------------------------------------------------------------------------------------------------------------------------------------------------------------|----------------------------------------------------------------------------------------------------------------------------------------------------------------------------------------------------------------------------------------------------------------------------------------------------------------------------------------------------|
| <ul style="list-style-type: none"> <li>• phenanthrene (J.T. Baker)</li> <li>• pyrene (J.T. Baker)</li> </ul>                                                                                                                                                                 | <ul style="list-style-type: none"> <li>• <b>System:</b> Prominence, Shimadzu, Kyoto, Japan</li> <li>• <b>Column:</b> LiChrospher C18 column (5µm; 250 x 4 mm; Knauer, Berlin, Germany).</li> <li>• <b>Injection:</b> 20 µL injected of acetonitrile diluted two times in ultrapure water.</li> </ul>                                                | <ul style="list-style-type: none"> <li>• <b>System:</b> Prominence Fluorescence detector, Shimadzu, Kyoto, Japan</li> <li>• <b>Quantification:</b> PAH concentrations were quantified with external standard calibrations.</li> </ul>                                                                                                              |
| <ul style="list-style-type: none"> <li>• HHCB (International Flavors &amp; Fragrances, Hilversum, NL)</li> <li>• nonylphenol (Acros Organics, NJ, USA)</li> <li>• triclosan (Sigma-Aldrich)</li> <li>• methyl-triclosan (Dr Ehrenstorfer GmbH, Augsburg, Germany)</li> </ul> | <ul style="list-style-type: none"> <li>• <b>System:</b> ThermoQuest Trace GC 2000 (Thermo Fisher Scientific)</li> <li>• <b>Column:</b> DB-5MS fused silica column (60 m × 0.25 mm, 0.25 µm film thickness; J&amp;W Scientific, Folsom, CA, USA).</li> <li>• <b>Injection:</b> 1 µL of the extracts was directly injected cold on-column.</li> </ul> | <ul style="list-style-type: none"> <li>• <b>System:</b> Finnigan Trace MS quadrupole MS (Thermo Fisher Scientific)</li> <li>• <b>Quantification:</b> Selected ion monitoring (SIM), identification was based on retention time and three or four (nonylphenol) compound specific masses (Table S6). and external standard calibrations.</li> </ul> |
| <ul style="list-style-type: none"> <li>• BPA (Sigma-Aldrich)</li> </ul>                                                                                                                                                                                                      | <ul style="list-style-type: none"> <li>• <b>System:</b> Prominence, Shimadzu, Kyoto, Japan</li> <li>• <b>Column:</b> Kinetex 5 µm (2.1 x 50 mm)</li> <li>• <b>Injection:</b> 20 µL injected of acetonitrile diluted three times in ultrapure water</li> </ul>                                                                                       | <ul style="list-style-type: none"> <li>• <b>System:</b> QTRAP 4000 MS system (AB SCIEX, MA, USA)</li> <li>• <b>Mode:</b> negative electrospray ionization (ESI)</li> <li>• <b>Quantification:</b> BPA concentrations were quantified with external standard calibrations.</li> </ul>                                                               |
| <ul style="list-style-type: none"> <li>• Pesticides via LC-MS/MS</li> </ul>                                                                                                                                                                                                  | <ul style="list-style-type: none"> <li>• <b>System:</b> Accela 1250 HPLC system (Thermo Fisher Scientific) equipped with a CTC autosampler</li> <li>• <b>Column:</b> Hypersil GOLD aQTM SPE column (20 X 2.1 mm, 12 µm) + Hypersil GOLDTM HPLC column (50 X 2.1 mm, 3 µm), both Thermo Fisher Scientific) <b>Injection:</b> 1 µL</li> </ul>         | <ul style="list-style-type: none"> <li>• <b>System:</b> TSQ Vantage triple quadrupole mass spectrometer</li> <li>• <b>Mode:</b> negative and positive mode with an electrospray ionization source (Thermo Fisher Scientific).</li> <li>• <b>Quantification:</b> selected reaction monitoring (SRM), and multiple external standards</li> </ul>     |
| <ul style="list-style-type: none"> <li>• Pesticides via GC-MS</li> </ul>                                                                                                                                                                                                     | <ul style="list-style-type: none"> <li>• <b>System:</b> Trace GC system (Thermo Fisher Scientific)</li> <li>• <b>Column:</b> DB-5MS fused silica column (30 m X 0.25 mm, 0.25 µm film thickness, J&amp;W Scientific).</li> </ul>                                                                                                                    | <ul style="list-style-type: none"> <li>• <b>System:</b> Dual stage quadrupole (DSQ) MS (Thermo Fisher Scientific)</li> <li>• <b>Quantification:</b> selected ion recording (SIR) mode, and multiple external standards</li> </ul>                                                                                                                  |

## **PAHs (HPLC)**

For PAH detection in the acetonitrile SPME extracts, after 1 minute, the acetonitrile concentration was slowly increased to 80% at 8 minutes. From minute 8 to 11, the acetonitrile concentration was increased to 100%, after which the concentration was decreased to 45% at 15 minutes. Measurements started with a 45:55 acetonitrile:water (v:v) solution. Phenanthrene fluorescence was measured at 250/385 nm and pyrene fluorescence was measured at 335/383 nm.

## **WWTP markers (LC and GC)**

*BPA (HPLC)*. Retention of BPA was achieved on a Shimadzu Shim-pack XR-ODS III column (50 X 2.0 mm; 1.6 µm particle size) with the column oven set to 35 °C. The mobile phase consisted 0.1% acetic acid in ultrapure water (pump A) and methanol (pump B) with the following gradient at a flow rate of 0.3 mL/min: t=0: 20% B; t=3: 100% B; t=4.5: 100% B; t=5: 20% B, followed by 3 minutes equilibration before the next injection. External calibration standards prepared in 30/70 acetonitrile/water (v/v) had concentrations ranging from 0.07 – 200 µg/L. Using a log normalized linear calibration curve in the appropriate range ( $R^2 > 0.9999$ ) showed a maximum deviation of 3% from the calculated concentrations for external calibration standards. Ionisation with negative ESI was used (400 °C, IS -4500V), and BPA was quantified with m/z 227/211.6 (CE -24 eV) with additional qualifying m/z 227/132.8 (CE -33 eV). Data acquisition and peak analysis were performed with AB SCIEX Analyst software (ver. 1.5.1).

*HHCB, nonylphenol, triclosan and methyl-triclosan (GC)*. HHCB, nonylphenol, triclosan and methyl-triclosan analysis in the hexane SPME extracts was performed on a ThermoQuest Trace GC 2000 system (Thermo Fisher Scientific) fitted with a DB-5MS fused silica column (60 m × 0.25 mm, 0.25 µm film thickness; J&W Scientific, Folsom, CA, USA). Helium was used as a carrier gas at a constant flow of 1.6 mL/min. Mass spectrometric detection was performed using electron impact ionization (EI) carried out at 70 eV.

**Table S6.** Temperature program applied in GC-method for chemical analysis of WWTP marker compound concentrations in hexane SPME extracts equilibrated in sediment slurries for 28 d.

| rate (°C/min) | temperature (°C) | time (min) |
|---------------|------------------|------------|
|               | 50               | 2          |
| 60            | 180              | 0          |
| 5             | 220              | 0          |
| 20            | 230              | 0          |
| 2             | 235              | 5          |
| 20            | 325              | 5          |

**Table S7.** Retention times and identification masses applied in GC-method for chemical analysis of WWTP marker compound concentrations in hexane SPME extracts equilibrated in sediment slurries for 28 d.

| Compound         | retention time (min) | identification masses |
|------------------|----------------------|-----------------------|
| nonylphenol      | 10.00-12.25          | 107, 121, 135, 146    |
| HHCB             | 12.25-14.80          | 213, 243, 258         |
| Triclosan        | 14.80-16.88          | 218, 288, 290         |
| methyl-tricolsan | 16.88-20.00          | 252, 302, 304         |

### **Pesticides (LC-MS/MS and GC-MS)**

Acetonitrile SPME extracts were subjected to chemical screening for 150 commonly used pesticides at the laboratory of the water authority of Fryslân using liquid chromatography coupled to tandem mass spectrometry (LC-MS/MS), as well as gas chromatography coupled to mass spectrometry (GC-MS). Liquid chromatography (LC) was performed on an Accela 1250 HPLC system (Thermo Fisher Scientific, Landsmeer, The Netherlands) equipped with a CTC autosampler. For LC analysis, 50 µL of the acetonitrile extracts was evaporated and reconstituted in 5 mL of artificial surface water. Chromatographic separation was performed on a Hypersil GOLD™ HPLC column (50 × 2.1 mm, 3 µm particle size, Thermo Fisher Scientific) preceded by a Hypersil GOLD aQ™ SPE column (20 × 2.1 mm, 12 µm particle size, Thermo Fisher Scientific) using a methanol/water system (Tables



S8-9). Detection of compounds was performed on a TSQ Vantage triple quadrupole mass spectrometer (MS) equipped with an electrospray ionization source (Thermo Fisher Scientific). Target compounds were identified based on selected reaction monitoring (SRM), and quantified by multiple external standard calibrations. For gas chromatography (GC), acetonitrile SPME extracts were directly analysed in duplicate on a Trace GC system (Thermo Fisher Scientific) fitted with a DB-5MS fused silica column (30 m × 0.25 mm, 0.25 µm film thickness; J&W Scientific, Folsom, CA, USA). Detection of compounds was performed on a dual stage quadrupole (DSQ) MS (Thermo Fisher Scientific) set to selected ion recording (SIR) mode. Identification of target compounds was based on retention time and three compound specific masses, one quantification mass and two masses for peak ratios, for confirmation of the compound. Identified compound concentrations in the extracts were quantified with a five-point calibration curve, applying a correction for internal standard recovery for each specific compound.

**Table S8.** Gradients of solvent A (MQ-water + 0.5% acetic acid) and B (MeOH + 0.5% acetic acid) applied in HPLC-method for chemical analysis of 150 pesticides.

| <b>method 1</b> |               |      |      |
|-----------------|---------------|------|------|
| time (min)      | flow (mL/min) | % A  | % B  |
| 0.00            | 0.5           | 95.0 | 5.0  |
| 2.00            | 0.5           | 70.0 | 30.0 |
| 8.00            | 0.5           | 60.0 | 40.0 |
| 10.00           | 0.5           | 20.0 | 80.0 |
| 12.00           | 0.5           | 95.0 | 5.0  |
| 14.00           | 0.5           | 95.0 | 5.0  |
| <b>method 2</b> |               |      |      |
| 0.00            | 0.5           | 95.0 | 5.0  |
| 1.00            | 0.5           | 95.0 | 5.0  |
| 4.50            | 0.5           | 40.0 | 60.0 |
| 6.50            | 0.5           | 40.0 | 60.0 |
| 10.00           | 0.5           | 2.0  | 98.0 |
| 14.00           | 0.5           | 2.0  | 98.0 |
| 15.00           | 0.5           | 95.0 | 5.0  |
| 19.00           | 0.5           | 95.0 | 5.0  |
| <b>method 3</b> |               |      |      |
| 0.00            | 0.35          | 98.0 | 2.0  |
| 1.25            | 0.35          | 98.0 | 2.0  |
| 10.00           | 0.35          | 10.0 | 90.0 |
| 12.00           | 0.35          | 80.0 | 20.0 |

14.00      0.35                      80.0      20.0

**Table S9.** Gradients of solvent C (MQ-water + 0.5% acetic acid) and D (MeOH) applied in SPE-method for chemical analysis of 150 pesticides.

| <b>method 1</b> |               |       |       |
|-----------------|---------------|-------|-------|
| time (min)      | flow (mL/min) | % C   | % D   |
| 0.00            | 1.0           | 100.0 | 0.0   |
| 1.50            | 1.0           | 100.0 | 0.0   |
| 1.60            | 0.1           | 0.0   | 100.0 |
| 4.90            | 0.1           | 0.0   | 100.0 |
| 5.00            | 1.0           | 0.0   | 100.0 |
| 8.00            | 1.0           | 0.0   | 100.0 |
| 9.00            | 0.1           | 0.0   | 100.0 |
| 11.00           | 1.0           | 100.0 | 0.0   |
| 13.00           | 1.0           | 100.0 | 0.0   |
| 14.00           | 0.1           | 100.0 | 0.0   |
| <b>method 2</b> |               |       |       |
| 0.00            | 1.0           | 100.0 | 0.0   |
| 1.50            | 1.0           | 100.0 | 0.0   |
| 1.60            | 0.1           | 0.0   | 100.0 |
| 4.90            | 0.1           | 0.0   | 100.0 |
| 5.00            | 1.0           | 0.0   | 100.0 |
| 7.00            | 1.0           | 0.0   | 100.0 |
| 7.10            | 0.1           | 100.0 | 0.0   |
| 15.00           | 1.0           | 100.0 | 0.0   |
| 17.00           | 1.0           | 100.0 | 0.0   |
| 17.01           | 0.2           | 100.0 | 0.0   |
| <b>method 3</b> |               |       |       |
| 0.00            | 1.00          | 100.0 | 0.0   |
| 1.25            | 1.00          | 100.0 | 0.0   |
| 1.50            | 0.10          | 0.0   | 100.0 |
| 6.00            | 0.10          | 0.0   | 100.0 |
| 8.00            | 1.00          | 0.0   | 100.0 |
| 9.00            | 1.00          | 0.0   | 100.0 |
| 10.00           | 1.00          | 100.0 | 0.0   |
| 13.00           | 1.00          | 100.0 | 0.0   |

**Table S10.** Temperature programme applied in GC-method for chemical analysis of 150 pesticides.

| rate (°C/min) | temperature (°C) | time (min) |
|---------------|------------------|------------|
|               | 35               | 5          |
| 10            | 180              | 5          |
| 3             | 200              | 5          |
| 25            | 280              | 5          |

### **SPME measurement reliability and assurance of non-depletive equilibration**

To check for differences between individual fibers within one sediment sample, the pyrene concentration in three fibers from a single sediment sample from the Wittenkade was analyzed. The relative standard deviation between these fibers was 1%. In addition, a 33% increase in pyrene concentration was observed in the Wittenkade when comparing the 1-month to the 2-month samples. Therefore, the PAH concentrations in this experiment were determined by using one 2-month equilibrated SPME fiber per site (n=1). To investigate the variation in pesticide accumulation in SPME fibers between replicates and equilibration times, pesticide concentrations in two 1 month exposed and one two month exposed fibers in the Sexbierum sediment were compared. Pesticide concentration correspondence between the two 1-month exposed replicates was on average 96% (88-108 %; 6 detected compounds) for LC analysed compounds and 129% (58-282%; 4 detected compounds) for GC analysed compounds. Pesticide concentration correspondence between the 1- and 2-month exposed replicates was on average 90% (63-115%) for LC analysed compounds and 72% (39-117%) for GC analysed compounds. Hence, variation was greater for GC analysed compounds compared to LC analysed compounds. This may be due to the required additional sample treatment before GC analysis, but may also partly be attributable to the longer equilibration times required for compounds with higher  $\log K_{OW}$  values which are targeted in GC analysis. This is further illustrated by the observation that the detected levels of GC analysed compounds were generally lower in the one month than the two month equilibrated fibers. One month exposed SPME fibers were used for pesticide analyses, implying that the detected pore water concentrations for GC analysed pesticides may be an underestimation of the actual concentrations in the sediment cores.

A hypothetical calculation can effectively illustrate that non-depletive equilibration of SPME fibers with the sediment pore water was achieved:

Each used 4 cm SPME fiber has a polymer volume of approximately 0.6 mL, which roughly equates to 0.6 mg of polymer material. As three fibers were exposed per treatment, 1.8 mg of polymer material was equilibrated with the sediment. Per treatment, 5 g of wet sediment was used, which

roughly equates to 3 g sediment dry-weight. The lowest OC content measured in the used sediments, which was hence the worst-case scenario for potential depletive equilibration, was 0.5 %, equating to approximately 15 mg of OC per treatment. Thus, 15 mg of OC was equilibrated with 1.8 mg of polymer material, leaving a considerable margin for non-depletive equilibration of the SPME fibers with the sediments in the present study design.

**Table S11.** Freely dissolved contaminant concentrations detected in sediments from sites with different land uses. AS = artificial sediment, other location codes are defined in Table S2, n.m. = not measured.

|                     |                    | Unit | reference |      | urban |      |      |      |      | WWTP |      |      | agriculture |      |      |
|---------------------|--------------------|------|-----------|------|-------|------|------|------|------|------|------|------|-------------|------|------|
|                     |                    |      | AS        | SP   | WK    | WBV  | WD   | BG   | OBV  | HI   | EI   | UT   | BW          | WL   | SX   |
| <b>metals</b>       | Cd                 | µg/L | -         | -    | -     | -    | -    | 0.04 | 0.03 | -    | 0.04 | -    | -           | -    | -    |
|                     | Cr                 | µg/L | 0.02      | 0.1  | 0.2   | 0.9  | 0.6  | 0.6  | 2.1  | 0.1  | 0.1  | 0.1  | 0.1         | 0.1  | 0.4  |
|                     | Cu                 | µg/L | 0.7       | 0.2  | 2.0   | 7.2  | 6.6  | 8.9  | 6.3  | 2.2  | 0.7  | 1.6  | 0.2         | 0.1  | 2.3  |
|                     | Ni                 | µg/L | -         | -    | 1.9   | 7.8  | 8.2  | 6.1  | 3.4  | 0.8  | 1.7  | 1.9  | -           | -    | 5.0  |
|                     | Pb                 | µg/L | 0.2       | 0.1  | 0.5   | 0.8  | 1.0  | 2.0  | 0.8  | 0.1  | 0.1  | 0.6  | 0.1         | 0.1  | 0.1  |
|                     | Zn                 | µg/L | 0.2       | 0.5  | 6.0   | 11.5 | 13.6 | 15.7 | 6.5  | 4.4  | 2.5  | 4.8  | 0.5         | 1.3  | 1.5  |
| <b>PAHs</b>         | phenanthrene       | µg/L | -         | 0.9  | 22.2  | -    | -    | 42.4 | -    | 6.3  | 1.5  | 4.8  | 0.7         | 1.7  | 0.5  |
|                     | pyrene             | µg/L | -         | 0.02 | 2.4   | 0.3  | 0.1  | 6.3  | 0.1  | 0.6  | 0.2  | 0.5  | 0.1         | 0.1  | 0.01 |
| <b>WWTP markers</b> | HHCB               | ng/L | -         | -    | -     | -    | -    | -    | -    | 40.2 | 10.7 | 46.8 | -           | -    | -    |
|                     | bisphenol A        | ng/L | 88        | 96   | n.m.  | 177  | 445  | 68   | 165  | 658  | 919  | 896  | 90          | 666  | 56   |
|                     | nonylphenol        | ng/L | 153       | 194  | 172   | 125  | 190  | 200  | 1086 | 311  | 151  | 380  | -           | 147  | -    |
|                     | triclosan          | ng/L | -         | -    | -     | -    | -    | -    | -    | 2944 | -    | 2442 | -           | -    | -    |
| <b>pesticides</b>   | azoxystrobin       | ng/L | -         | -    | -     | -    | -    | -    | -    | -    | -    | -    | -           | 2528 | 4802 |
|                     | bixafen            | ng/L | -         | -    | -     | -    | -    | -    | -    | -    | -    | -    | -           | -    | 72.6 |
|                     | boscalid           | ng/L | -         | -    | -     | -    | -    | -    | -    | -    | -    | -    | -           | 2649 | 1091 |
|                     | chlorpyrifos       | ng/L | -         | -    | -     | -    | -    | -    | -    | -    | -    | -    | -           | 8.6  | -    |
|                     | dicofol            | ng/L | -         | -    | -     | -    | -    | 0.2  | -    | -    | -    | 0.2  | -           | -    | -    |
|                     | diflufenican       | ng/L | -         | -    | -     | -    | -    | -    | -    | -    | 3.3  | -    | -           | -    | -    |
|                     | esfenvalerate      | ng/L | -         | -    | -     | -    | -    | -    | -    | -    | -    | -    | -           | 2.9  | 0.3  |
|                     | fluopicolide       | ng/L | -         | -    | -     | -    | -    | -    | -    | -    | -    | -    | -           | -    | 1067 |
|                     | flutolanil         | ng/L | -         | -    | -     | -    | -    | -    | -    | -    | -    | -    | 252         | -    | 117  |
|                     | lambda-cyhalothrin | ng/L | -         | -    | -     | -    | -    | -    | -    | -    | -    | -    | -           | -    | 0.04 |
| pencycuron          | ng/L               | -    | -         | -    | -     | -    | -    | -    | -    | -    | -    | -    | -           | 64.9 |      |

|              |      |   |     |   |     |     |     |     |     |     |     |     |     |      |
|--------------|------|---|-----|---|-----|-----|-----|-----|-----|-----|-----|-----|-----|------|
| prosulfocarb | ng/L | - | 0.7 | - | 0.7 | -   | 0.3 | 1.1 | 0.4 | 0.7 | 0.9 | 0.4 | 5.7 | 8.8  |
| tebuconazole | ng/L | - | -   | - | -   | -   | -   | -   | -   | -   | -   | -   | -   | 11.7 |
| tri-allate   | ng/L | - | -   | - | 0.6 | 0.9 | 0.5 | 0.8 | 0.6 | -   | 0.8 | 0.4 | 2.3 | -    |

#### SI 4 – Physical chemical sediment characteristics.

**Materials and methods - Physical chemical characterization of sediment.** *Particle size distribution.* All sediments were subjected to the dry sieving method (Cammeraat & Imeson, 1998). One sediment sample (>20 gr) per location was oven-dried at 30 °C and then fractionated using mesh sieves to obtain eight size fractions. Sieves were shaken for 5 min at 40 Hz using a horizontal shaking machine (AS 200 basic; Retsch, Aartselaar, Belgium) and each fraction was weighed.

*C:N ratio and Total Organic Carbon content (TOC).* One sediment core per location was dried and homogenized, and approximately 20 gr was ground using a planetary mill (Pulverisette 5; Fritsch, Idar-Oberstein, Germany) for 5 minutes at 400 rpm. Approximately 5 mg of ground sediment was used to determine the total C and N content in duplicate on an element analyzer (Vario El cube; Elementar, Langenselbold Germany). Total inorganic carbon (TIC) content was determined in duplicate based on weight loss by dissolution of CaCO<sub>3</sub> using a soliTIC module attached to the element analyser. By subtracting the TIC content from the total carbon content in the samples, the total organic carbon (TOC) content in the sediments was determined.

Cammeraat, L. H.; Imeson, A. C. Deriving indicators of soil degradation from soil aggregation studies in southeastern Spain and southern France. *Geomorphology* **1998**, 23 (2–4), 307–321.

**Table S12.** Characteristics of the investigated sediments. TOC = total organic carbon; N = nitrogen content; C:N = carbon to nitrogen ratio; ND = not determined; \* calculated.

| name code                | fraction<br><63 $\mu\text{m}$<br>(%) | TOC (%) | N (%) | C:N  |
|--------------------------|--------------------------------------|---------|-------|------|
| AS (artificial sediment) | 13.28                                | 5.00*   | ND    | ND   |
| SP (reference)           | 1.12                                 | 3.12    | 0.22  | 14.5 |
| WK                       | 1.09                                 | 4.69    | 0.17  | 28.2 |
| WBV                      | 4.29                                 | 7.88    | 0.72  | 10.9 |
| WD                       | 3.08                                 | 7.83    | 0.65  | 12.1 |
| BG                       | 8.51                                 | 9.31    | 0.4   | 23.2 |
| OBV                      | 1.19                                 | 6.89    | 0.38  | 18.0 |
| HI                       | 0.41                                 | 1.90    | 0.11  | 17.6 |
| EI                       | 7.01                                 | 2.08    | 0.18  | 11.6 |
| UT                       | 0.20                                 | 3.37    | 0.14  | 24.2 |
| BW                       | 1.51                                 | 0.45    | 0.05  | 8.3  |
| WL                       | 1.23                                 | 0.45    | 0.03  | 13.2 |
| SX                       | 2.11                                 | 1.48    | 0.18  | 8.1  |

**Results - Physical chemical sediment characteristics.** Sediment characteristics varied among the different sediments (Table S12). All field collected sediments contained >90% sand (>63  $\mu\text{m}$ ), and the fraction <63  $\mu\text{m}$  ranged between 0.2% (UT) and 8.51% (BG). Except for the three most sandy field sediments (UT, HI and WK), this is within the particle size range between the reference location (SP, 1.1%) and the artificial sediment (13.3%). The percentage TOC was highest in the urban sediments (4.7 - 9.3 %), and lowest in the agricultural sediments (0.5-1.5 %). The C:N ratio, an indicator of the nutritional value of the organic matter, ranged between 8.1 (SX) and 28.2 (WK), but no land use related pattern in C:N ratio became apparent.



## **SI 5 – Data analyses and toxicity indices.**

### **Statistical analysis of bioassay responses**

In order to increase the field relevance of the 28 d *C. riparius* life cycle whole sediment bioassays, results of the contaminated sites were compared to the reference site (SP), rather than to the artificial sediment. As such, the artificial sediment served purely as a control of test performance and test organism viability, while the reference field sediment served as an uncontaminated reference for the field sediments, representative of midge survival, emergence and emergence time on natural sediments. Since the survival and emergence data of the whole sediment bioassays were not normally distributed, a Mann-Whitney U test was performed, to test for statistical differences between the reference and contaminated sediments. The mean emergence time ( $EmT_{50}$ ), i.e. the day at which 50% emergence occurred, was calculated for each field location as well as for the artificial sediment by plotting the cumulative number of emerged midges against time, normalised to percentages for each treatment.<sup>1</sup> Since emergence times between males and females differ, this was done separately for each gender. Non-linear regression was performed using the logistic curve containing the  $EmT_{50}$  as a parameter. Significant differences between the reference site and all other treatments were checked using a one-way ANOVA with Dunnett's multiple comparison post-hoc test with significance level at  $p < 0.05$ . Statistical analyses were performed in SPSS® (IBM SPSS Statistics, Version 24, Armonk, NY, USA) for survival and emergence data, and in GraphPad Prism® (GraphPad Software Inc., Version 5.00, San Diego, CA, USA) for  $EmT_{50}$  calculations.

### **Toxicity index calculations**

Three previously described toxicity indices were calculated to determine the potential toxicity of the detected contaminant concentrations in the sediments. A cumulative EAR of the mixture of detected compounds ( $EAR_{mixture}$ ) was calculated for each location by summing the EAR profiles of each of the compounds using the R package *ToxEval*<sup>2</sup> as previously described.<sup>3</sup> For metals, no toxicity data were available within the USEPA ToxCast database<sup>4</sup> at the time of writing, and these were hence excluded from  $EAR_{mixture}$  calculations.

Toxic pressures of individual chemicals, expressed as potentially affected fractions (PAF), were derived using previously reported chronic NOEC SSDs.<sup>5</sup> Subsequently, mixture toxic pressures, expressed as msPAF-NOEC, were derived assuming mixture toxicity according to the “mixed model” by De Zwart and Posthuma (2005).<sup>6</sup>

A literature search was performed to obtain reported ecotoxicity data for the detected compounds with identical endpoints for a single species, to allow for TU calculations. Effect concentrations were collected from the USEPA ECOTOX database<sup>10</sup> and peer-reviewed scientific literature. When no records were available through the former sources, effect concentrations were obtained from the University of Hertfordshire Pesticides Property Database,<sup>11</sup> adhering to an A5 data quality distinction of records. For *C. riparius*, no sufficiently homogeneous dataset with effect concentrations was available for reliable TU calculation, and hence it was decided to use reported acute (48 h) 50% toxic effect concentrations (EC<sub>50</sub>) of the detected compounds to *D. magna* (Table S13), given the extensive data availability for this species and its common use as model organism for toxicity to aquatic invertebrates. Cumulative TUs were calculated by summing the lowest reported TU values for separate compounds per location assuming response additivity, in which TU was defined as the ratio of the measured concentration of a given compound to its EC<sub>50</sub>.<sup>7</sup>

Bioassay responses were summarised in a toxicity index in which each location was attributed a point for the occurrence of lethal and sublethal effects respectively.

EAR<sub>mixture</sub> values  $\geq 1$  indicate that measured compounds are at a concentration expected to produce bioactivity for a given endpoint.<sup>3</sup> For msPAF, a threshold value for acceptable risk of 5% was previously adopted based on EU-WFD policy.<sup>8</sup> For TU, a threshold value of 0.1, based on European Commission Uniform Principles, was previously used for risk interpretation in surface water.<sup>12</sup>

(1) Vogt, C.; Nowak, C.; Diogo, J. B.; Oetken, M.; Schwenk, K.; Oehlmann, J. Multi-Generation Studies with *Chironomus Riparius* - Effects of Low Tributyltin Concentrations on Life History Parameters and Genetic Diversity. *Chemosphere* **2007**, *67* (11), 2192–2200. <https://doi.org/10.1016/j.chemosphere.2006.12.025>.

- (2) De Cicco, L. A.; Corsi, S. R.; Villeneuve, D. L.; Blackwell, B.; Ankley, G. T. ToxEval: Evaluation of Measured Concentration Data Using the ToxCast High-Throughput Screening Database or a User-Defined Set of Concentration Benchmarks, R package version 1.0.0, 2018 <http://usgs-r.github.io/toxEval/index.html> (accessed Sep 3, 2019).
- (3) Blackwell, B. R.; Ankley, G. T.; Bradley, P. M.; Houck, K. A.; Makarov, S. S.; Medvedev, A. V.; Swintek, J.; Villeneuve, D. L. Potential Toxicity of Complex Mixtures in Surface Waters from a Nationwide Survey of United States Streams: Identifying in Vitro Bioactivities and Causative Chemicals. *Environ. Sci. Technol.* **2019**, *53* (2), 973–983. <https://doi.org/10.1021/acs.est.8b05304>.
- (4) U.S. EPA. iCSS ToxCast Dashboard, <https://comptox.epa.gov/dashboard/> (accessed Sep 3, 2019).
- (5) Posthuma, L.; van Gils, J.; Zijp, M. C.; van de Meent, D.; de Zwart, D. Species Sensitivity Distributions for Use in Environmental Protection, Assessment, and Management of Aquatic Ecosystems for 12 386 Chemicals. *Environ. Toxicol. Chem.* **2019**, *38* (4), 703–711. <https://doi.org/10.1002/etc.4373>.
- (6) De Zwart, D.; Posthuma, L. Complex Mixture Toxicity for Single and Multiple Species: Proposed Methodologies. *Environ. Toxicol. Chem.* **2005**, *24* (10), 2665–2676. <https://doi.org/10.1897/04-639R.1>.
- (7) Sprague, J. B. Measurement of Pollutant Toxicity to Fish-III. Sublethal Effects and “Safe” Concentrations. *Water Res.* **1971**, *5* (6), 245–266. [https://doi.org/10.1016/0043-1354\(71\)90171-0](https://doi.org/10.1016/0043-1354(71)90171-0).
- (8) Lindim, C.; de Zwart, D.; Cousins, I. T.; Kutsarova, S.; Kühne, R.; Schüürmann, G. Exposure and Ecotoxicological Risk Assessment of Mixtures of Top Prescribed Pharmaceuticals in Swedish Freshwaters. *Chemosphere* **2019**, *220*, 344–352. <https://doi.org/10.1016/J.CHEMOSPHERE.2018.12.118>.
- (9) Bundschuh, M.; Goedkoop, W.; Kreuger, J. Evaluation of Pesticide Monitoring Strategies in Agricultural Streams Based on the Toxic-Unit Concept - Experiences from Long-Term Measurements. *Sci. Total Environ.* **2014**, *484* (1). <https://doi.org/10.1016/j.scitotenv.2014.03.015>.
- (10) U.S. EPA. ECOTOX Database, <https://cfpub.epa.gov/ecotox/> (accessed Sep 3, 2019).

(11) University of Hertfordshire, Pesticide Properties Database (PPDB), <http://sitem.herts.ac.uk/aeru/iupac/> (accessed Sep 3, 2019).

(12) Bundschuh, M.; Goedkoop, W.; Kreuger, J. Evaluation of Pesticide Monitoring Strategies in Agricultural Streams Based on the Toxic-Unit Concept - Experiences from Long-Term Measurements. *Sci. Total Environ.* **2014**, *484* (1), 84–91. <https://doi.org/10.1016/j.scitotenv.2014.03.015>.

**Table S13.** Reported aquatic acute (48 h) EC<sub>50</sub> values for the detected compounds to *D. magna*, used for TU calculations.

| compound | unit | EC <sub>50</sub> | notes | used for TU calculation | reference                     | DOI/web address                   |
|----------|------|------------------|-------|-------------------------|-------------------------------|-----------------------------------|
| Cd       | µg/L | 3                |       | •                       | Yim et al., 2006              | 10.1016/j.jhazmat.2005.11.107     |
| Cd       | µg/L | 13.5             |       |                         | Meyer et al., 2014            | 10.1002/etc.2787                  |
| Cd       | µg/L | 39               |       |                         | Nelson et al, 1984            | 10.1002/etc.5620030212            |
| Cd       | µg/L | 58.16            |       |                         | Attar & Maly, 1982            | 10.1007/BF01055205                |
| Cd       | µg/L | 65               |       |                         | Biesinger & Christensen, 1972 | 10.1139/f72-269                   |
| Cd       | µg/L | 69               |       |                         | Dave et al., 1981             | 10.1016/0306-4492(81)90105-2      |
| Cd       | µg/L | 142              |       |                         | Lari et al., 2017             | 10.1016/j.jhazmat.2017.03.060     |
| Cd       | µg/L | 170              |       |                         | Teodorovic et al., 2009       | 10.2478/s11535-009-0048-7         |
| Cd       | µg/L | 310              |       |                         | Meng et al., 2008             | 10.1109/ICBBE.2008.298            |
| Cd       | µg/L | 1880             |       |                         | Khangarot & Ray, 1989         | 10.1016/0147-6513(89)90071-7      |
| Cr       | µg/L | 160              |       | •                       | Fargassova 1994               | 10.1007/BF00192051                |
| Cr       | µg/L | 1790             |       |                         | Khangarot & Ray, 1989         | 10.1016/0147-6513(89)90071-7      |
| Cr       | µg/L | 9070             |       |                         | Meng et al., 2008             | 10.1109/ICBBE.2008.298            |
| Cu       | µg/L | 4                |       | •                       | Yim et al., 2006              | 10.1016/j.jhazmat.2005.11.107     |
| Cu       | µg/L | 9.8              |       |                         | Biesinger & Christensen, 1972 | 10.1139/f72-269                   |
| Cu       | µg/L | 31.8             |       |                         | Borgmann & Charlton, 1984     | 10.1016/S0380-1330(84)71855-7     |
| Cu       | µg/L | 34.5             |       |                         | Lari et al., 2017             | 10.1016/j.jhazmat.2017.03.060     |
| Cu       | µg/L | 41               |       |                         | Elnabarawy et al., 1986       | 10.1002/etc.5620050409            |
| Cu       | µg/L | 66.8             |       |                         | De Schampelaere et al 2005    | 10.1016/j.chemosphere.2004.06.039 |
| Cu       | µg/L | 93               |       |                         | Khangarot & Ray, 1989         | 10.1016/0147-6513(89)90071-7      |
| Cu       | µg/L | 103              |       |                         | Meyer et al., 2014            | 10.1002/etc.2787                  |
| Cu       | µg/L | 168              |       |                         | De Schampelaere et al 2002    | 10.1016/S1532-0456(02)00087-X     |
| Cu       | µg/L | 820              |       |                         | Meng et al., 2008             | 10.1109/ICBBE.2008.298            |
| Ni       | µg/L | 510              |       | •                       | Biesinger & Christensen, 1972 | 10.1139/f72-269                   |
| Ni       | µg/L | 1068             |       |                         | Pane et al., 2003             | 10.1021/es034317I                 |
| Ni       | µg/L | 1120             |       |                         | Biesinger & Christensen, 1972 | 10.1139/f72-270                   |
| Ni       | µg/L | 1503             |       |                         | Lari et al., 2017             | 10.1016/j.jhazmat.2017.03.060     |

|              |      |       |   |                               |                                                                         |
|--------------|------|-------|---|-------------------------------|-------------------------------------------------------------------------|
| Ni           | µg/L | 7290  |   | Khangarot & Ray, 1989         | 10.1016/0147-6513(89)90071-7                                            |
| Ni           | µg/L | 7300  |   | Khangarot et al., 1987        | 10.1002/aheh.19870150415                                                |
| Ni           | µg/L | 7590  |   | Khangarot & Ray, 1989         | 10.1016/0147-6513(89)90071-7                                            |
| Pb           | µg/L | 95    | • | Yim et al., 2006              | 10.1016/j.jhazmat.2005.11.107                                           |
| Pb           | µg/L | 450   |   | Biesinger & Christensen, 1972 | 10.1139/f72-269                                                         |
| Pb           | µg/L | 1815  |   | Elnabarawy et al., 1986       | 10.1002/etc.5620050409                                                  |
| Pb           | µg/L | 1880  |   | Offem & Ayotunde, 2008        | 10.1007/s11270-008-9632-0                                               |
| Pb           | µg/L | 2630  |   | Khangarot et al., 1987        | 10.1002/aheh.19870150415                                                |
| Pb           | µg/L | 3610  |   | Khangarot & Ray, 1989         | 10.1016/0147-6513(89)90071-7                                            |
| Pb           | µg/L | 3730  |   | Fargassova 1994               | 10.1007/BF00192051                                                      |
| Pb           | µg/L | 5100  |   | Meng et al., 2008             | 10.1109/ICBBE.2008.298                                                  |
| Pb           | µg/L | 74730 |   | Teodorovic et al., 2009       | 10.2478/s11535-009-0048-7                                               |
| Zn           | µg/L | 100   | • | Biesinger & Christensen, 1972 | 10.1139/f72-269                                                         |
| Zn           | µg/L | 300   |   | Yim et al., 2006              | 10.1016/j.jhazmat.2005.11.107                                           |
| Zn           | µg/L | 319   |   | Lari et al., 2017             | 10.1016/j.jhazmat.2017.03.060                                           |
| Zn           | µg/L | 330   |   | De Schampelaere et al 2005    | 10.1016/j.chemosphere.2004.06.039                                       |
| Zn           | µg/L | 410   |   | Teodorovic et al., 2009       | 10.2478/s11535-009-0048-7                                               |
| Zn           | µg/L | 560   |   | Khangarot & Ray, 1989         | 10.1016/0147-6513(89)90071-7                                            |
| Zn           | µg/L | 696   |   | Meyer et al., 2014            | 10.1002/etc.2787                                                        |
| Zn           | µg/L | 779   |   | Attar & Maly, 1982            | 10.1007/BF01055205                                                      |
| Zn           | µg/L | 920   |   | Hall et al. 1986              | 10.1111/j.1752-1688.1986.tb00763.x                                      |
| Zn           | µg/L | 2800  |   | Bowmer et al., 1998           | 10.1016/S0045-6535(98)00116-7                                           |
| phenanthrene | µg/L | 207   | • | Abernethy et al., 1986        | 10.1016/0166-445X(86)90062-7                                            |
| phenanthrene | µg/L | 383   |   | Muñoz & Tarazona, 1993        | 10.1007/BF00197195                                                      |
| phenanthrene | µg/L | 410   |   | Pagnout et al., 2006          | 10.1016/j.ecoenv.2006.03.005                                            |
| phenanthrene | µg/L | 500   |   | Baun et al., 2008             | 10.1016/j.aquatox.2007.11.019                                           |
| phenanthrene | µg/L | 570   |   | Feldmannová et al., 2006      | 10.1002/tox.20198                                                       |
| phenanthrene | µg/L | 604   |   | Verrhiest et al., 2001        | 10.1023/A:10122230<br>10.1577/1548-<br>8659(1984)113<74:CATTAO>2.0.CO;2 |
| phenanthrene | µg/L | 700   |   | Millemann et al., 1984        | 10.1007/BF01055652                                                      |
| phenanthrene | µg/L | 843   |   | Eastmond et al., 1984         | 10.1007/BF01055652                                                      |
| phenanthrene | µg/L | 950   |   | Xie et al., 2006              | 10.1897/05-256R.1                                                       |

|              |      |          |             |                                                            |                                                                                         |
|--------------|------|----------|-------------|------------------------------------------------------------|-----------------------------------------------------------------------------------------|
| phenanthrene | µg/L | 1159     |             | Bobra et al., 1983                                         | 10.1016/0045-6535(83)90118-2                                                            |
| pyrene       | µg/L | 74.1     | •           | Clément et al., 2007                                       | 10.1080/10406630591007260                                                               |
| pyrene       | µg/L | 91       |             | Abernethy et al., 1986                                     | 10.1016/0166-445X(86)90062-7                                                            |
| pyrene       | µg/L | 133      |             | Pagnout et al., 2006                                       | 10.1016/j.ecoenv.2006.03.005                                                            |
| pyrene       | µg/L | 1820.25  |             | Bobra et al., 1983                                         | 10.1016/0045-6535(83)90118-2                                                            |
| HHCB         | ng/L | 194000   | •           | Chen et al., 2015                                          | 10.1007/s00128-015-1543-3                                                               |
| HHCB         | ng/L | 3330000  |             | Pablos et al., 2015                                        | 10.1007/s11356-015-4119-1                                                               |
| bisphenol A  | ng/L | 7750000  |             | Brennan et al., 2006                                       | 10.1016/j.chemosphere.2005.11.046                                                       |
| bisphenol A  | ng/L | 9940000  |             | Mansilha et al., 2013                                      | 10.1007/s11356-013-1614-0                                                               |
| bisphenol A  | ng/L | 10000000 |             | Chen et al., 2002                                          | 10.1002/tox.10035                                                                       |
| bisphenol A  | ng/L | 10200000 |             | Alexander et al., 1988                                     | 10.1002/etc.5620070104                                                                  |
| bisphenol A  | ng/L | 12800000 |             | Hirano et al., 2004                                        | 10.1248/jhs.50.97                                                                       |
| nonylphenol  | ng/L | 180000   | •           | Hirano et al., 2004                                        | 10.1248/jhs.50.97                                                                       |
| nonylphenol  | ng/L | 190000   |             | Comber et al., 1993                                        | 10.1016/0043-1354(93)90086-W                                                            |
| triclosan    | ng/L | 241766   |             | Sengupta et al., 2015                                      | 10.1016/j.chemosphere.2015.02.027                                                       |
| triclosan    | ng/L | 338000   |             | Wang et al., 2013                                          | 10.1016/j.jhazmat.2013.07.007                                                           |
| triclosan    | ng/L | 390000   |             | Orvos et al., 2002                                         | 10.1002/etc.5620210703                                                                  |
| triclosan    | ng/L | 856800   |             | Silva et al., 2015                                         | 10.1016/j.ecoenv.2015.02.022                                                            |
| azoxystrobin | ng/L | 71000    | •           | Warming et al., 2009                                       | 10.1897/08-279.1                                                                        |
| azoxystrobin | ng/L | 98000    |             | Warming et al., 2009                                       | 10.1897/08-279.1                                                                        |
| azoxystrobin | ng/L | 277000   |             | Warming et al., 2009                                       | 10.1897/08-279.1                                                                        |
| azoxystrobin | ng/L | 340000   |             | Ochoa-Acuña et al., 2009                                   | 10.1007/s10646-009-0298-1                                                               |
| bixafen      | ng/L | 1200000  | quality: A5 | University of Hertfordshire, Pesticide Properties Database | <a href="http://sitem.herts.ac.uk/aeru/iupac/">http://sitem.herts.ac.uk/aeru/iupac/</a> |
| boscalid     | ng/L | 5330000  | quality: A5 | University of Hertfordshire, Pesticide Properties Database | <a href="http://sitem.herts.ac.uk/aeru/iupac/">http://sitem.herts.ac.uk/aeru/iupac/</a> |
| chlorpyrifos | ng/L | 190      | •           | Kikuchi et al., 2000                                       | 10.1006/eesa.2000.195                                                                   |
| chlorpyrifos | ng/L | 325      |             | Diamantino et al., 1998                                    | 10.1007/s001289900                                                                      |
| chlorpyrifos | ng/L | 480      |             | Rubach et al., 2011                                        | 10.1007/s00244-010-9582-6                                                               |
| chlorpyrifos | ng/L | 600      |             | Moore et al., 1998                                         | 10.1007/s002449900299                                                                   |
| chlorpyrifos | ng/L | 740      |             | Palma et al., 2008                                         | 10.1007/s00128-008-9517-3                                                               |
| chlorpyrifos | ng/L | 900      |             | Matsumoto et al., 2009                                     | n.a.                                                                                    |
| chlorpyrifos | ng/L | 1220     |             | Demetrio et al., 2014                                      | 10.1007/s00128-014-1336-0                                                               |

|                    |      |          |             |   |                                                            |                                                                                         |
|--------------------|------|----------|-------------|---|------------------------------------------------------------|-----------------------------------------------------------------------------------------|
| chlorpyrifos       | ng/L | 7120     |             |   | Liu et al., 2012                                           | 10.1016/j.ecoenv.2012.02.014                                                            |
| chlorpyrifos       | ng/L | 14500    |             |   | Perez et al., 2015                                         | 10.1007/s10646-015-1489-6                                                               |
| chlorpyrifos       | ng/L | 580000   |             |   | Loureiro et al., 2010                                      | 10.1002/etc.198                                                                         |
| dicofol            | ng/L | 200000   |             | • | Haeba et al., 2008                                         | 10.1065/espr2007.12.466                                                                 |
| diflufenican       | ng/L | 240000   |             | • | Weyman et al., 2012                                        | 10.1002/etc.1856                                                                        |
| diflufenican       | ng/L | 240000   | quality: A5 |   | University of Hertfordshire, Pesticide Properties Database | <a href="http://sitem.herts.ac.uk/aeru/iupac/">http://sitem.herts.ac.uk/aeru/iupac/</a> |
| esfenvalerate      | ng/L | 270      |             | • | Fairchild et al., 1992                                     | 10.1002/etc.5620110111                                                                  |
| esfenvalerate      | ng/L | 270      | quality: A5 |   | University of Hertfordshire, Pesticide Properties Database | <a href="http://sitem.herts.ac.uk/aeru/iupac/">http://sitem.herts.ac.uk/aeru/iupac/</a> |
| esfenvalerate      | ng/L | 1160     |             |   | Bjergager et al., 2012                                     | 10.1016/j.aquatox.2011.12.001                                                           |
| fluopicolide       | ng/L | 1800000  | quality: A5 | • | University of Hertfordshire, Pesticide Properties Database | <a href="http://sitem.herts.ac.uk/aeru/iupac/">http://sitem.herts.ac.uk/aeru/iupac/</a> |
| flutolanil         | ng/L | 6800000  | quality: A5 | • | University of Hertfordshire, Pesticide Properties Database | <a href="http://sitem.herts.ac.uk/aeru/iupac/">http://sitem.herts.ac.uk/aeru/iupac/</a> |
| flutolanil         | ng/L | 10000000 |             |   | Matsumoto et al., 2009                                     | n.a.                                                                                    |
| lambda-cyhalothrin | ng/L | 360      | quality: A5 | • | University of Hertfordshire, Pesticide Properties Database | <a href="http://sitem.herts.ac.uk/aeru/iupac/">http://sitem.herts.ac.uk/aeru/iupac/</a> |
| lambda-cyhalothrin | ng/L | 391      |             |   | Barata et al., 2006                                        | 10.1016/j.aquatox.2006.01.013                                                           |
| lambda-cyhalothrin | ng/L | 1040     |             |   | Mokry & Hoagland, 1990                                     | 10.1002/etc.5620090811                                                                  |
| pencycuron         | ng/L | 300000   | quality: A5 | • | University of Hertfordshire, Pesticide Properties Database | <a href="http://sitem.herts.ac.uk/aeru/iupac/">http://sitem.herts.ac.uk/aeru/iupac/</a> |
| pencycuron         | ng/L | 10000000 |             |   | Matsumoto et al., 2009                                     | n.a.                                                                                    |
| prosulfocarb       | ng/L | 510000   | quality: A5 | • | University of Hertfordshire, Pesticide Properties Database | <a href="http://sitem.herts.ac.uk/aeru/iupac/">http://sitem.herts.ac.uk/aeru/iupac/</a> |
| tebuconazole       | ng/L | 750000   |             | • | Ochoa-Acuña et al., 2009                                   | 10.1007/s10646-009-0298-1                                                               |
| tebuconazole       | ng/L | 2790000  | quality: A5 |   | University of Hertfordshire, Pesticide Properties Database | <a href="http://sitem.herts.ac.uk/aeru/iupac/">http://sitem.herts.ac.uk/aeru/iupac/</a> |
| tebuconazole       | ng/L | 3631000  |             |   | Li et al., 2015                                            | 10.1016/j.chemosphere.2014.11.031                                                       |
| tri-allate         | ng/L | 80000    |             | • | Buhl & Faerber, 1989                                       | 10.1007/BF01055019                                                                      |
| tri-allate         | ng/L | 91000    |             |   | Peterson & Hulting, 2004                                   | 10.1614/WS-03-149R                                                                      |
| tri-allate         | ng/L | 91000    | quality: A5 |   | University of Hertfordshire, Pesticide Properties Database | <a href="http://sitem.herts.ac.uk/aeru/iupac/">http://sitem.herts.ac.uk/aeru/iupac/</a> |



**Table S14.** Toxicity indices and the top contributing compounds per index and location, calculated based on detected freely dissolved contaminant concentrations in sediments of 12 field locations.

| location | EAR <sub>mixture</sub> | toxicity index  |           |                 |      |                 |
|----------|------------------------|-----------------|-----------|-----------------|------|-----------------|
|          |                        | top contaminant | msPAF (%) | top contaminant | TU   | top contaminant |
| SP       | 0.22                   | bisphenol A     | 17.1      | nonylphenol     | 0.05 | Cu              |
| WK       | 0.06                   | phenanthrene    | 46.7      | pyrene          | 0.70 | Cu              |
| WBV      | 0.41                   | bisphenol A     | 40.4      | Cu              | 1.95 | Cu              |
| WD       | 1.02                   | bisphenol A     | 43.4      | nonylphenol     | 1.81 | Cu              |
| BG       | 0.28                   | bisphenol A     | 74.5      | pyrene          | 2.73 | Cu              |
| OBV      | 0.38                   | bisphenol A     | 59.1      | nonylphenol     | 1.69 | Cu              |
| HI       | 1.79                   | bisphenol A     | 40.4      | nonylphenol     | 0.65 | Cu              |
| EI       | 2.11                   | bisphenol A     | 19.5      | nonylphenol     | 0.22 | Cu              |
| UT       | 2.28                   | bisphenol A     | 41.7      | nonylphenol     | 0.50 | Cu              |
| BW       | 0.22                   | bisphenol A     | 0.7       | pyrene          | 0.06 | Cu              |
| WL       | 1.77                   | bisphenol A     | 26.9      | nonylphenol     | 0.14 | chlorpyrifos    |
| SX       | 0.56                   | azoxystrobin    | 21.1      | azoxystrobin    | 0.68 | Cu              |

## SI 6 – Bioassay quality criteria and midge emergence.

**Table S15.** Quality control measurements (average  $\pm$  st.err), i.e. pH, O<sub>2</sub>, conductivity and NH<sub>4</sub><sup>+</sup> on day 28 of the experiment. \* 1 core omitted from analyses due to low oxygen saturation.

| land use    | location          | name code | pH            | O <sub>2</sub> (% saturation) | conductivity ( $\mu$ S/cm) | NH <sub>4</sub> <sup>+</sup> (mg/L) |
|-------------|-------------------|-----------|---------------|-------------------------------|----------------------------|-------------------------------------|
| Reference   | Science Park      | SP        | 8.8 $\pm$ 0,0 | 86 $\pm$ 3                    | 1334 $\pm$ 37              | 0.1 $\pm$ 0.0                       |
|             | Wittenkade        | WK        | 8.8 $\pm$ 0,0 | 86 $\pm$ 1                    | 1739 $\pm$ 96              | 0.0 $\pm$ 0.0                       |
|             | Wittenburgervaart | WBV       | 8.6 $\pm$ 0,0 | 90 $\pm$ 0                    | 4238 $\pm$ 235             | 0.1 $\pm$ 0.0                       |
| Urban       | Westerdok         | WD        | 8.5 $\pm$ 0,1 | 92 $\pm$ 0                    | 4764 $\pm$ 207             | 0.1 $\pm$ 0.0                       |
|             | Bickersgracht     | BG        | 8.6 $\pm$ 0,0 | 87 $\pm$ 0                    | 3416 $\pm$ 677             | 0.1 $\pm$ 0.0                       |
|             | Oostenburgervaart | OBV       | 8.7 $\pm$ 0,1 | 84 $\pm$ 1                    | 2348 $\pm$ 223             | 0.0 $\pm$ 0.0                       |
|             | Hilversum         | HI        | 7.9 $\pm$ 0,1 | 63 $\pm$ 2*                   | 817 $\pm$ 89               | 0.3 $\pm$ 0.1                       |
| WWTP        | Eindhoven         | EI        | 8.2 $\pm$ 0,1 | 62 $\pm$ 1                    | 891 $\pm$ 53               | 0.2 $\pm$ 0.0                       |
|             | Utrecht           | UT        | 8.6 $\pm$ 0,0 | 54 $\pm$ 4*                   | 1117 $\pm$ 62              | 0.2 $\pm$ 0.0                       |
|             | Balgweg           | BW        | 8.7 $\pm$ 0,0 | 91 $\pm$ 1                    | 1299 $\pm$ 55              | 0.1 $\pm$ 0.0                       |
| agriculture | Westland          | WL        | 8.8 $\pm$ 0,0 | 86 $\pm$ 1                    | 1154 $\pm$ 42              | 0.0 $\pm$ 0.0                       |
|             | Sexbierum         | SX        | 8.6 $\pm$ 0,1 | 60 $\pm$ 5                    | 5654 $\pm$ 231             | 1.1 $\pm$ 0.7                       |

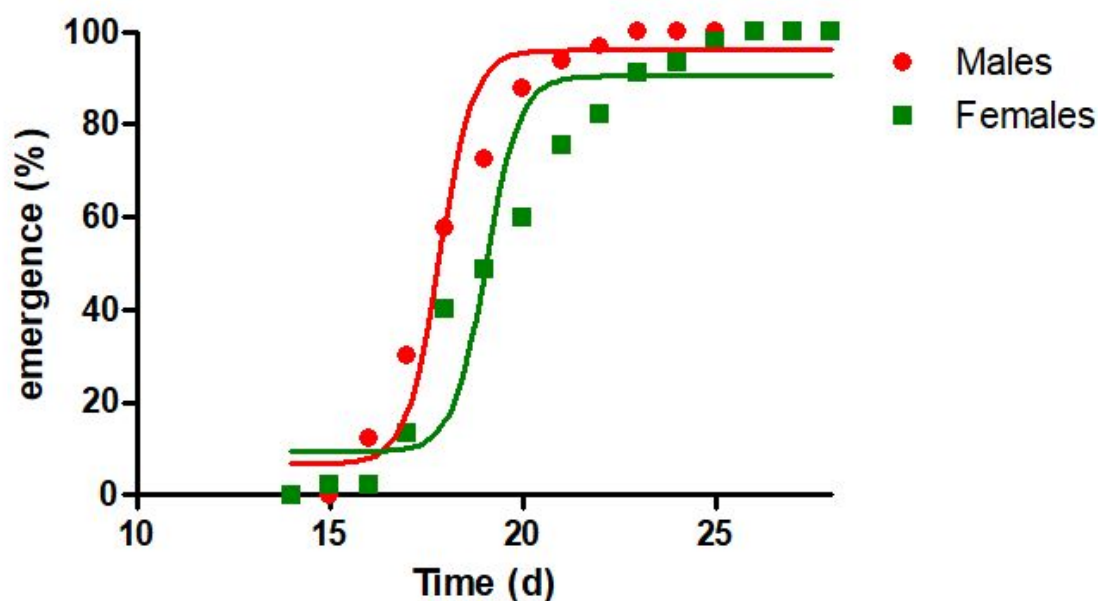

**Figure S2.** Curve fit of the log logistic model to emergence time of *C. riparius* males (red circles) and females (green squares) after 28 d exposure to whole sediment cores from the reference site.
